## **A role for phagocytosis in inducing cell death during thymocyte negative selection**

Nadia S. Kurd<sup>1,2</sup>, Lydia K. Lutes<sup>1</sup>, Jaewon Yoon<sup>1</sup>, Ivan L. Dzhagalov<sup>1,3</sup>, Ashley Hoover<sup>1,4</sup>, and Ellen A. Robey<sup>\*1</sup>

1. Division of Immunology and Pathogenesis, Department of Molecular and Cell Biology, University of California Berkeley, Berkeley, California, USA.
2. Present address: Department of Medicine, University of California San Diego, San Diego, California, USA.
3. Present address: Institute of Microbiology and Immunology, National Yang-Ming University, Taipei, Taiwan.
4. Present address: Oklahoma Medical Research Foundation, Oklahoma City, Oklahoma, USA.

\*Correspondence should be addressed to E.A.R. (erobey@berkeley.edu)

## **Abstract**

Autoreactive thymocytes are eliminated during negative selection in the thymus, a process important for establishing self-tolerance. Thymic phagocytes serve to remove dead thymocytes, but whether they play additional roles during negative selection remains unclear. Here, we demonstrate that phagocytosis promotes negative selection, and that negative selection is more efficient when the phagocyte also presents the negative selecting peptide. Our findings support a two-step model for negative selection in which thymocytes initiate the death process following strong TCR signaling, but ultimately depend upon phagocytosis for their timely death. Thus, the phagocytic capability of cells that present self-peptides is a key determinant of thymocyte fate.

## 1 **Introduction**

2

3 During negative selection, thymocytes bearing self-reactive T cell receptors (TCR)

4 are eliminated from the T cell repertoire, an important process for the

5 establishment of self-tolerance. Thymocytes interact with a variety of thymic-

6 resident cells that present self-peptide:MHC complexes, and thymocytes bearing

7 TCRs with high affinity for self-ligands can receive apoptotic death signals<sup>1</sup>.

8 Apoptosis is an immunologically silent form of cell death that is generally thought to

9 be cell-autonomous once initiated<sup>2</sup>. Although peptide-presenting cells provide the

10 initial apoptotic stimulus to autoreactive thymocytes, whether additional cellular

11 interactions are required to mediate thymocyte death remains unknown.

12

13 In addition to the affinity of TCR for self-peptide-MHC, the nature of the peptide-

14 presenting cell is also an important determinant of T cell fate. For example,

15 hematopoietic cells, especially dendritic cells (DC), are potent inducers of negative

16 selection, whereas cortical thymic epithelial cells (cTEC) are specialized to mediate

17 positive selection, promoting thymocyte maturation and survival<sup>3-8</sup>. Distinctive

18 features of these cell types, including specialized peptide processing machinery in

19 cTECs and high expression of costimulatory ligands in DCs, play an important role in

20 instructing divergent thymocyte fates<sup>1,8</sup>. Peptide repertoire and costimulation can

21 contribute to the intensity of TCR signal experienced by a thymocyte, but whether

22 the peptide-presenting cells provide additional TCR-independent signals to promote

23 thymocyte death or differentiation is largely unknown.

24

25 A related question is whether a strong TCR signal is sufficient to commit thymocytes  
26 to die in a cell-autonomous fashion, or whether other cellular interactions are  
27 required. Early observations of apoptotic bodies within thymic phagocytes <sup>2,9</sup>,  
28 together with time-lapse microscopy of thymocytes undergoing negative selection<sup>3-</sup>  
29 <sup>8,10</sup>, suggest a close coupling between thymocyte death and phagocytosis. In  
30 particular, visualization of dying thymocytes and phagocytes within thymic tissue  
31 slices showed that the death of autoreactive thymocytes invariably occurred during  
32 close contact with phagocytes, and in most cases death appeared to occur after  
33 phagocytosis<sup>10</sup>. However, it remained unclear whether phagocytes actually  
34 contributed to the death of thymocytes by serving as peptide-presenting cells  
35 and/or by actively inducing cell death.

36

37 Dendritic cells are the most potent antigen-presenting cells (APC) for priming naïve  
38 T cells and also present self-peptide for negative selection<sup>3-7,11</sup>, whereas thymic  
39 macrophages are known for their role in clearing away apoptotic thymocytes<sup>9</sup>.  
40 Nevertheless, there is considerable functional and phenotypic overlap between DC  
41 and macrophages. For example, the marker F4/80 is often used to identify  
42 macrophages, but also marks a population with substantial antigen presentation  
43 function<sup>12</sup>. Likewise, the marker CD11c is often used to identify DCs, but is co-  
44 expressed with F4/80 by a subset of DC-like cells in the thymus<sup>13</sup>. To what extent  
45 the functions of peptide presentation and phagocytic clearance reside within  
46 separate or overlapping thymic cell populations remains unclear.

47

48 Phagocytes recognize and uptake apoptotic cells via receptors for “eat-me” signals  
49 displayed on the surface of dying cells<sup>14</sup>. For example, apoptosis induces  
50 asymmetry in the plasma membrane, leading to the exposure of phosphatidylserine  
51 (PS), which is then recognized by PS receptors on phagocytes. A variety of “eat-me”  
52 receptors are expressed and functional in the thymus<sup>15-17</sup>, but the mechanisms that  
53 mediate the efficient removal of autoreactive thymocytes during negative selection  
54 have not yet been clearly defined.

55

56 Here, we used a thymic slice system in which thymocytes undergo negative  
57 selection *in situ* to address these questions. We found that depletion of thymic  
58 phagocytes or blocking phagocytosis impaired negative selection, allowing for the  
59 increased survival of thymocytes that had experienced strong TCR signals. We also  
60 identified the PS receptor Tim-4 as an important player during negative selection to  
61 tissue-restricted antigens (TRA). Finally, we demonstrated that negative selection is  
62 most efficient when the same cell both presents the agonist peptide, and  
63 phagocytoses the self-reactive thymocyte. Taken together, our data suggest a two-  
64 step model for negative selection in which strong TCR signals initiate the apoptotic  
65 program, but thymocytes depend on phagocytosis for their timely death. Thus,  
66 thymic phagocytes are not merely “scavengers”, but rather play prominent roles in  
67 the induction of self-tolerance, both as peptide-presenting cells and as active  
68 inducers of self-reactive thymocyte death.

69

## 70 **Results**

### 71 **Depletion of thymic phagocytes inhibits negative selection**

72 To examine the role of phagocytes during negative selection, we used thymic tissue  
73 slices prepared from Macrophage-Associated Fas-Induced Apoptosis (MAFIA) mice.  
74 In these mice, an inducible suicide gene under the control of the colony stimulating  
75 factor 1 receptor (Csf1R) promoter is expressed in DC and macrophage subsets<sup>18</sup>.  
76 We have previously observed closely coupled thymocyte death and phagocytosis by  
77 GFP<sup>+</sup> cells in thymic slices from LysMGFP reporter mice<sup>10,19</sup>. Flow cytometric  
78 analysis of the thymus of LysMGFP mice revealed that GFP-expressing cells include a  
79 subset of F4/80<sup>hi</sup> macrophages that have been previously described as having  
80 potent phagocytic abilities, as well as a subset of CD11c<sup>hi</sup> DCs (Supplementary Fig.  
81 1a)<sup>10,16</sup>. We confirmed expression of the MAFIA transgene in these subsets using  
82 flow cytometric analysis to measure expression of a linked GFP gene  
83 (Supplementary Fig. 2a). We observed that treatment of thymic slices for 16 hours  
84 of culture with the small molecule inducer AP20187 led to the depletion of  
85 approximately 50% of F4/80<sup>hi</sup> macrophages and CD11c<sup>hi</sup> DC (Supplementary Fig.  
86 2b).

87

88 To assess the impact of phagocyte depletion on negative selection, we used a  
89 previously described peptide-induced model of negative selection<sup>10,20</sup>. Thymocytes  
90 from mice with a defined MHC class I-restricted TCR transgene (OT-I) were overlaid  
91 onto thymic slices with or without the cognate antigen (SIINFEKL, OVAp), along  
92 with a reference thymocyte population (F5 TCR transgenic or polyclonal WT

93 thymocytes) (Fig. 1a). We used flow cytometry to determine the ratio of viable OT-  
94 I:reference thymocytes remaining in the slice as a measure of negative selection  
95 <sup>10,20,21</sup> (Fig. 1a). Consistent with our previous study<sup>10</sup>, we observed a substantial  
96 reduction in the number of live OT-I thymocytes relative to reference thymocytes in  
97 thymic slices containing OVAp after 16 hours of culture (Fig. 1b). In contrast, on  
98 phagocyte-depleted slices containing OVAp, the ratio of live OT-I:reference  
99 thymocytes was similar to that in -OVAp control slices, consistent with the idea that  
100 phagocytes promote negative selection.

101

102 Thymic phagocytes, including DCs, serve as APCs during negative selection<sup>4,6,8,12</sup>.

103 This raises the possibility that the observed defect in negative selection on  
104 phagocyte-depleted slices could be the result of thymocytes receiving insufficient  
105 TCR signals. However, OT-I thymocytes on phagocyte-depleted slices did not show  
106 decreased levels of the TCR activation marker CD69, arguing against impairment of  
107 TCR signals (Fig. 1c). These results suggest that thymocytes on phagocyte-depleted  
108 thymic slices exhibit enhanced survival despite continuing to receive strong TCR  
109 signals .

110

### 111 **Negative selection and phagocytosis in a model of tissue-restricted antigen** 112 **presentation**

113 Addition of agonist peptide directly to thymic tissue slices serves as a model for  
114 negative selection to ubiquitous self-antigen. To further characterize the  
115 relationship between thymocyte death and phagocytosis, we also examined a model

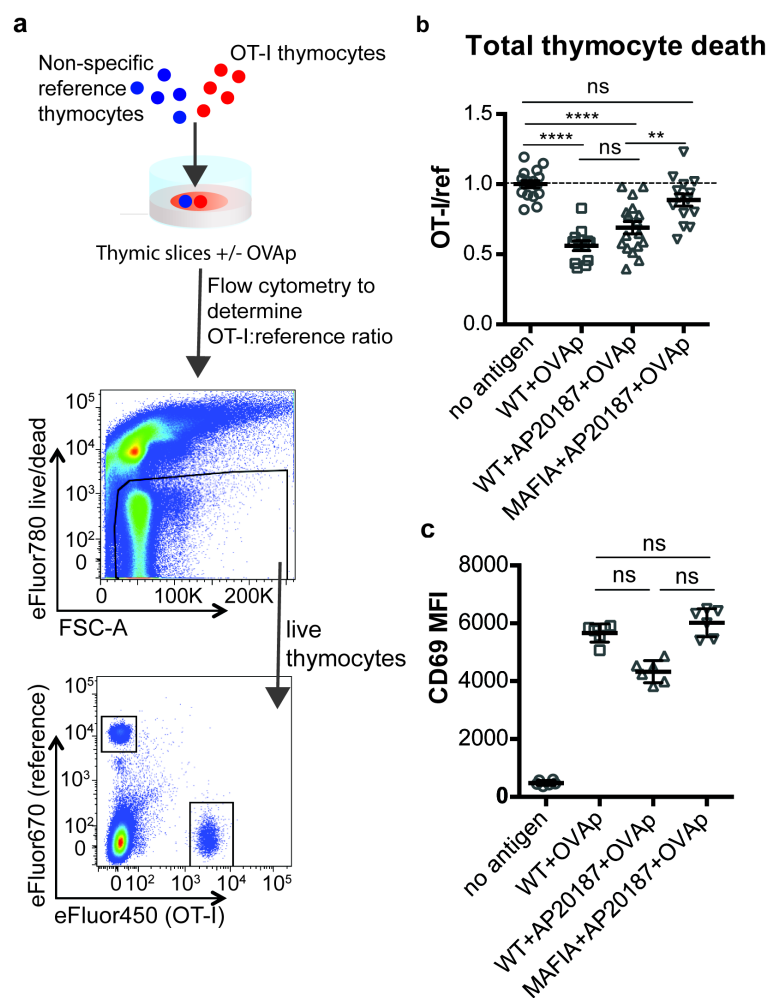

### Figure 1. Depletion of phagocytes inhibits negative selection without dampening antigen recognition

(a) Strategy to quantify negative selection: labeled OT-I and reference thymocytes (either wild type or F5 TCR transgenic) were overlaid onto thymic slices with or without OVA peptide, cultured for 16 hours, and then dissociated for analysis by flow cytometry. Lower panels show the flow cytometry gating strategy used to quantify live OT-I and reference thymocytes. (b-c) For depletion of phagocytes, WT or MAFIA thymic slices were treated with AP20187 and cultured for an additional 16 hours prior to the addition of thymocytes and peptide. b) Thymocyte death displayed as the ratio of live OT-I thymocytes relative to live reference thymocytes present within the slice. We further normalized the ratios of OT-I:reference thymocytes in each experiment so that the average of the corresponding “no OVA” samples was 1.0. (c) Expression of the activation marker CD69 by OT-I thymocytes displayed as Mean Fluorescence Intensity (MFI). ns not significant ( $p > 0.05$ ), \*\* $p < 0.01$ , \*\*\*\* $p < 0.0001$  (one-way ANOVA with Bonferroni’s correction with a 95% confidence interval, b, or Kruskal-Wallis test with Dunn’s multiple comparisons with a 95% confidence interval, c). Data are pooled from 3 independent experiments (b), or representative of 3 independent experiments (c), with mean and SEM of  $n=16$  (b) or 5 (c) total slices per condition, where each dot represents an individual slice.



116 of negative selection to TRA. In RIPmOVA transgenic mice, the model antigen  
117 ovalbumin (OVA), which provides the agonist peptide for OT-I thymocytes, is  
118 expressed in a subset of medullary thymic epithelial cells (mTECs), and is presented  
119 in the medulla by mTECs and hematopoietic-derived cells<sup>3,22</sup>. Because  
120 approximately 50% of CD4<sup>+</sup>CD8<sup>+</sup> double positive thymocytes, and all of the more  
121 mature CD8<sup>+</sup> single positive thymocytes from OT-I mice express a medullary  
122 chemokine receptor pattern (CXCR4-CCR7<sup>+</sup>) and migrate to the medulla in thymic  
123 slices<sup>23-26</sup>, we expected that the majority of OT-I thymocytes would encounter OVA  
124 when added to RIPmOVA slices. We observed that approximately 50% of OT-I  
125 thymocytes were lost by 9 hours, and there was no further reduction through 48  
126 hours of culture (Fig. 2a). Thus, the timing and extent of negative selection in a TRA  
127 model are in line with our previous results using a ubiquitous model of negative  
128 selection.

129

130 We used 2-photon time-lapse microscopy to visualize the interactions between OT-I  
131 thymocytes and phagocytes on RIPmOVA thymic slices<sup>10</sup>. To visualize thymocyte  
132 death, we used a previously described method in which thymocytes are double-  
133 labeled with a cytosolic dye (SNARF, shown in red) that escapes as cells lose  
134 membrane integrity, and a nuclear dye (Hoechst, shown in blue) that increases  
135 signal during apoptosis-associated chromatin changes<sup>10,27</sup>. OT-I thymocytes were  
136 overlaid onto thymic slices from LysMGFP RIPmOVA transgenic mice and imaged  
137 after 6-10 hours of culture. Consistent with our earlier study<sup>10</sup>, cell death occurred  
138 while thymocytes were in close contact with, or engulfed by, GFP-expressing

139 phagocytes (Fig. 2b, Supplementary Movies 1-2). Thus, the close coupling of  
140 autoreactive thymocyte death and phagocytosis occurs during negative selection to  
141 both tissue-restricted and ubiquitous self-antigens.

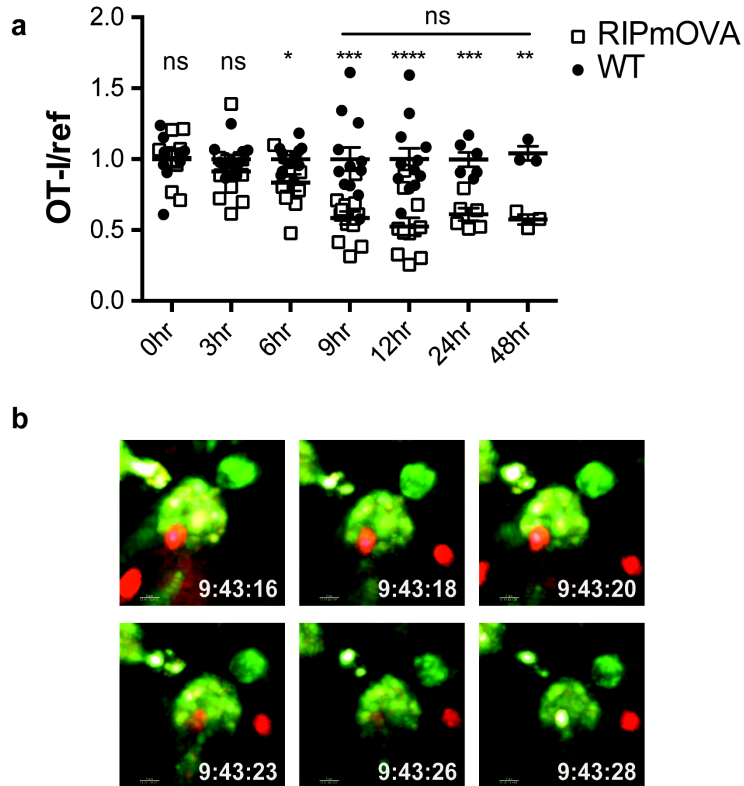

### Figure 2. Thymocyte death and phagocytosis during negative selection to tissue-restricted antigen

(a) Negative selection on RIPmOVA slices (open squares), displayed as the ratio of live OT-I thymocytes relative to live reference thymocytes present within the slice, normalized to no antigen controls (black squares). Data are pooled from 4 (0, 3, 6, 9, and 12 hour timepoints), 2 (24 hour timepoint), or 1 (48 hour timepoint) experiments, with mean and SEM of  $n=3$  (48hr WT and RIPmOVA), 6 (24hr WT and RIPmOVA), 9 (0hr WT and RIPmOVA), 7 (6hr RIPmOVA), 11 (12hr WT), 12 (3hr and 9hr WT and RIPmOVA, 6hr and 12hr WT) total slices per condition, respectively, where each dot represents an individual slice. ns not significant ( $p>0.05$ ), \* $p<0.05$ , \*\* $p<0.01$ , \*\*\* $p<0.001$ , \*\*\*\* $p<0.0001$ . Unpaired two-tailed Student's *t*-test of WT vs RIPmOVA for each timepoint, or two-way ANOVA with 95% confidence interval with Tukey's multiple comparisons test to compare RIPmOVA samples across timepoints (horizontal line). (b) Still images from a time-lapse series showing an example of OT-I thymocyte death. OT-I thymocytes were depleted of mature CD8 SP and labeled with Hoechst and SNARF before overlaying on LysMGFP RIPmOVA thymic slices. Slices were imaged by two-photon scanning laser microscopy. A 30-minute movie was recorded in the medulla, with the time elapsed since thymocyte entry into the slice shown in white.

142 **Phagocyte killing of autoreactive thymocytes is mediated by phosphatidyl**  
143 **serine receptors**

144 To determine whether phagocytes exert their effect on negative selection  
145 specifically through phagocytosis, we evaluated the efficiency of negative selection  
146 in an environment in which phagocytes are present, but impaired in their ability to  
147 phagocytose. Phosphatidylserine (PS) is exposed at the cell surface early in the  
148 apoptotic process, and serves as an “eat-me” signal to phagocytes<sup>14</sup>. To determine  
149 whether PS mediates phagocytosis of self-reactive thymocytes, we used Annexin V  
150 (AnnV), a small protein that binds to PS, to block the interaction between PS and its  
151 receptors in thymic slices<sup>28</sup>. Negative selection on RIPmOVA thymic slices was  
152 completely blocked by treatment of thymic slices with AnnV (Fig. 3a), while antigen  
153 recognition, as assessed by CD69 upregulation, was not impaired (Fig. 3b). AnnV  
154 addition had a similar effect on negative selection in response to OVAp (Fig. 3c,d).  
155 These results confirm that phagocytosis promotes the death of autoreactive  
156 thymocytes, and suggest that PS receptors are important for this process.

157

158 **The phosphatidylserine receptor Tim-4 promotes negative selection of CD8 T**  
159 **cells in the thymus**

160 Phagocytes express a number of receptors for PS, allowing them to recognize and  
161 uptake apoptotic cells<sup>14</sup>. These include Tim-4, a PS receptor previously reported to  
162 be expressed and functional in the thymus<sup>15</sup>. Using flow cytometry, we found that  
163 Tim-4 is expressed by almost all F4/80<sup>hi</sup> macrophages and ~30% of CD11c<sup>hi</sup> DCs  
164 (Supplementary Fig. 3a). To investigate whether Tim-4 plays a role in negative

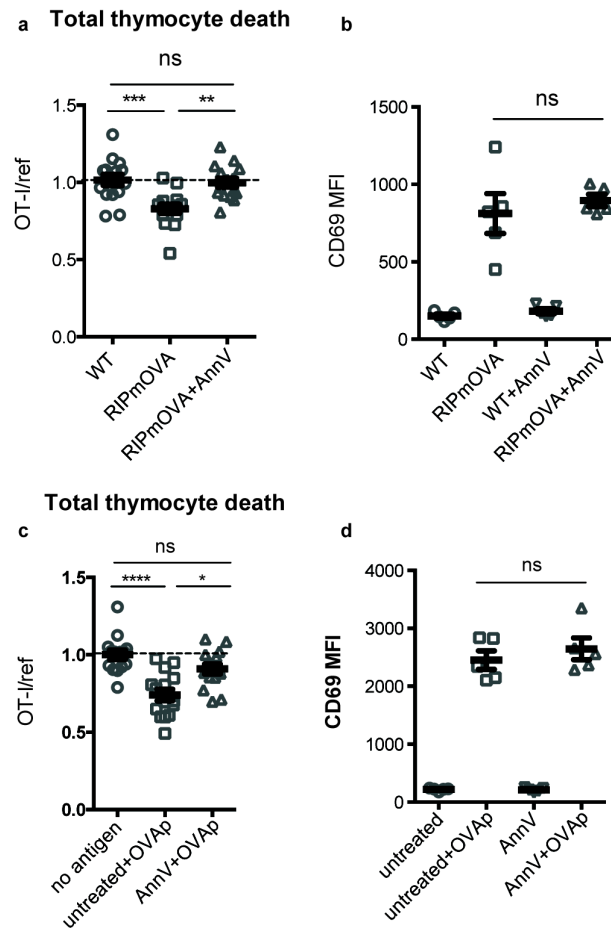

### Figure 3. Phagocyte killing of autoreactive thymocytes is mediated by phosphatidylserine receptors

OT-I and reference thymocytes in AnnV buffer with or without AnnV were overlaid onto RIPmOVA slices (a,b) or WT slices treated with OVAp (c,d). Slices were then treated with AnnV and harvested 16 hours later for flow cytometric analysis. (a,c) Negative selection displayed as the ratio of live OT-I thymocytes relative to live reference thymocytes, normalized to no antigen controls. (b,d) Antigen recognition of OT-I thymocytes displayed as Mean Fluorescence Intensity (MFI) of the activation marker CD69. ns not significant ( $p > 0.05$ ), \* $p < 0.01$ , \*\*\* $p < 0.001$ , \*\*\*\* $p < 0.0001$  (one-way ANOVA with Bonferroni's correction with a 95% confidence interval, a,c,d, or two-tailed unpaired Mann-Whitney test with 95% confidence interval, b). Data are pooled from 3 independent experiments (a,c), or representative of 3 independent experiments (b,d), with mean and SEM of  $n=15$  (a,c) or 5 (b,d) total slices per condition, where each dot represents an individual slice.

165 selection, we prepared thymic tissue slices from Tim-4<sup>-/-</sup> RIPmOVA transgenic mice,  
166 overlaid OT-I and reference thymocytes, and assessed the extent of negative  
167 selection after 16 hours of culture. OT-I thymocyte death was not detectable in Tim-  
168 4<sup>-/-</sup> RIPmOVA thymic slices, but was readily detectable in thymic slices from age and  
169 sex-matched Tim-4<sup>+/+</sup> RIPmOVA controls (Fig. 4a). Negative selection in response to  
170 OVAp was also slightly reduced on Tim-4<sup>-/-</sup> thymic slices, although the difference did  
171 not reach statistical significance (Fig. 4c). Normal CD69 upregulation by OT-I  
172 thymocytes suggested that OVA is presented normally in the Tim-4<sup>-/-</sup> thymic  
173 environment (Fig. 4b,d). This is consistent with the normal number and phenotype  
174 of thymic phagocytes that we observed in Tim-4<sup>-/-</sup> mice (Supplementary Fig. 3b,c,d).  
175 Taken together, these data support the idea that phagocytosis is required for  
176 effective negative selection, and suggest that Tim-4 is a relevant player in this  
177 process.

178

### 179 **Antigen presentation by phagocytes promotes efficient negative selection**

180 The close association between autoreactive thymocytes and phagocytes just prior to  
181 their engulfment and death<sup>10</sup> (Fig. 2c) suggests that phagocytes may also serve as  
182 APCs. Moreover, the ability of a peptide-presenting cell to phagocytose may make it  
183 more potent at inducing negative selection. To test this idea, we took advantage of  
184 the fact that bone marrow-derived dendritic cells (DCs) have phagocytic activity  
185 (Supplementary Fig. 4) and can serve as exogenous peptide presenting cells when  
186 overlaid and allowed to migrate into thymic slices<sup>29,30</sup>. We added OVA-loaded Tim-  
187 4<sup>-/-</sup> or WT DCs onto thymic slices that had been previously overlaid with OT-I and

188 reference thymocytes, and measured the extent of negative selection 16 hours later  
 189 (Fig. 5a). Interestingly, while OVA-loaded WT DCs induced a significant level of  
 190 negative selection, Tim-4<sup>-/-</sup> DCs failed to induce detectable negative selection (Fig.  
 191 5b). This defect was not due to a deficiency in peptide presentation by Tim-4<sup>-/-</sup> DCs,  
 192 as there was no significant difference in the upregulation of CD69 by OT-I  
 193 thymocytes (Fig. 5c). The fact that peptide-presenting cells defective in phagocytosis  
 194 were unable to effectively induce negative selection, despite the fact that functional  
 195 (non-presenting) endogenous phagocytes were present in the thymic slice, indicates  
 196 that negative selection is more efficient when the same cell serves both as APC and  
 197 phagocyte.

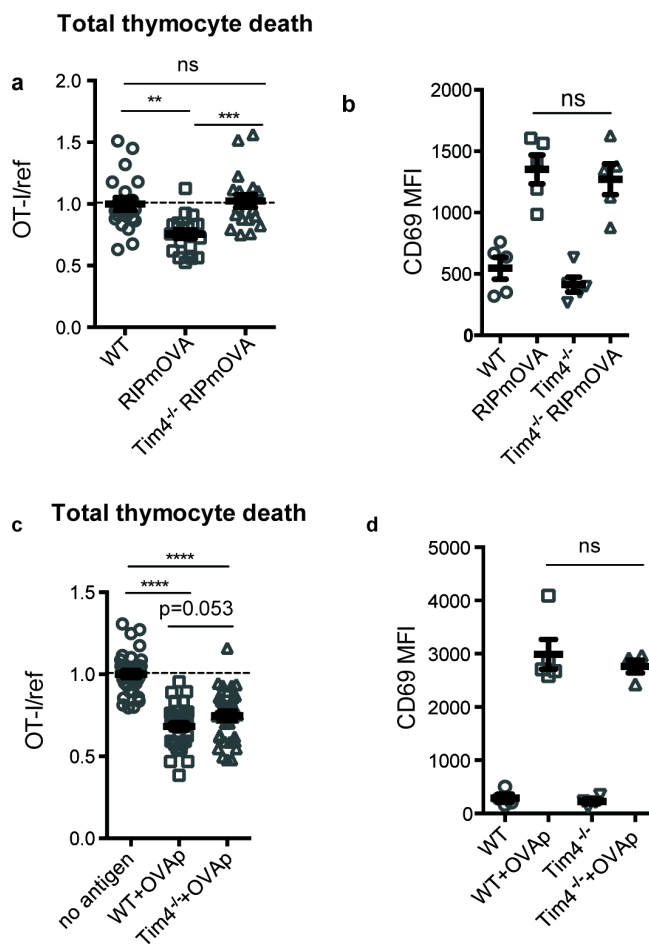

**Figure 4. The phosphatidylserine receptor Tim-4 promotes negative selection to tissue-restricted antigens**

OT-I and reference thymocytes were overlaid onto WT or Tim-4<sup>-/-</sup> thymic slices with or without the RIPmOVA transgene (a,b), or with or without addition of OVAp (c,d), and slices were dissociated and analyzed by flow cytometry 16 hours later. (a,c) Negative selection displayed as the ratio of surviving OT-I thymocytes relative to reference thymocytes, normalized to no antigen controls. (b,d) Antigen recognition of OT-I thymocytes displayed as Mean Fluorescence Intensity (MFI) of the activation marker CD69. ns not significant (p>0.05), \*\*p<0.01, \*\*\*p<0.001, \*\*\*\*p<0.0001 (one-way ANOVA with Bonferroni's correction with 95% confidence interval, a-c, or Kruskal-Wallis test with Dunn's multiple comparisons with 95% confidence interval, d). Data are pooled from 4 (a) or 7 (c) independent experiments, or representative of 4 (b) or 7 (d) independent experiments, with mean and SEM of n=20 (a), 35 (c) or 5 (b,d) total slices per condition, where each dot represents an individual slice.

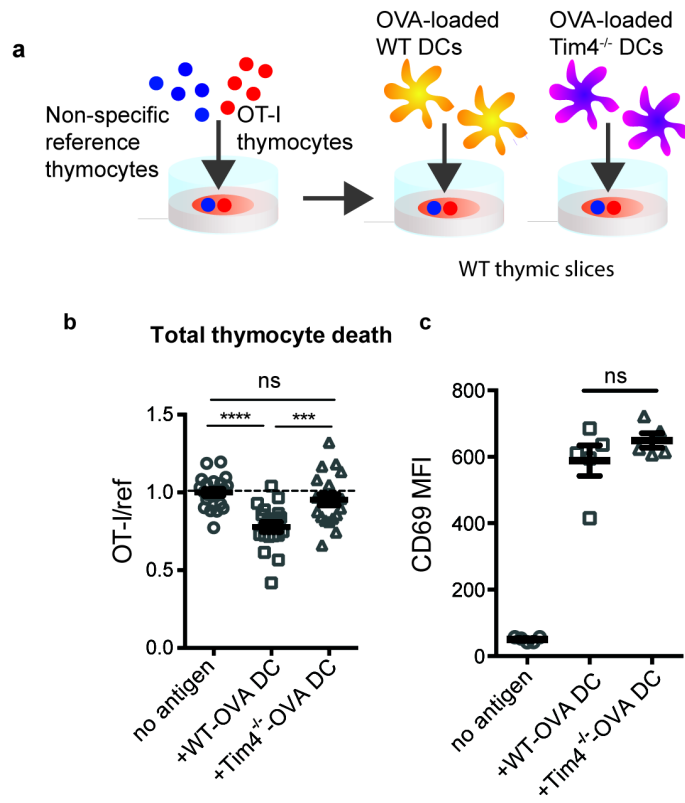

### Figure 5. Peptide presentation by phagocytes promotes efficient negative selection

(a) Schematic of the experimental setup: OT-I and reference thymocytes were overlaid onto WT thymic slices onto which OVA-loaded or unloaded WT or Tim-4<sup>-/-</sup> BMDCs were added. Slices were dissociated and analyzed by flow cytometry 16 hours later. (b) Negative selection displayed as the ratio of live OT-I thymocytes relative to live reference thymocytes, normalized to no antigen controls. Data are pooled from 4 experiments, with mean and SEM of n=20 total slices per condition shown in red. (c) Antigen recognition of OT-I thymocytes displayed as Mean Fluorescence Intensity (MFI) of the activation marker CD69. Data are representative of 4 independent experiments. ns not significant ( $p > 0.05$ ), \*\*\* $p < 0.001$ , \*\*\*\* $p < 0.0001$  (one-way ANOVA with Bonferroni's correction with 95% confidence interval). Data are pooled from 4 independent experiments (b), or representative of 4 independent experiments (c), with mean and SEM of n=20 (a), or 5 (c) total slices per condition, where each dot represents an individual slice.

198 **Discussion**

199

200 While the importance of phagocytes in clearing dead thymocytes has long been  
201 appreciated, their role during negative selection prior to thymocyte death remained  
202 unknown. Here, we provide evidence for key roles for phagocytes as antigen  
203 presenting cells and as active inducers of thymocyte death. We demonstrate that  
204 phagocytosis promotes autoreactive thymocyte death, and that the recognition of PS  
205 is critical for this process. Additionally, we show that negative selection is most  
206 efficient when the phagocyte also presents the negative selecting peptide. Taken  
207 together, our data support a multi-step model for negative selection in which a  
208 strong TCR signal initiates apoptosis, followed by phagocytosis to deliver the lethal  
209 hit. Moreover, the coupling of these two steps that occurs when phagocytes also  
210 serve as APCs leads to more efficient negative selection (Supplementary Fig. 5a).

211

212 *In vitro* studies of apoptosis support a model in which a death signal initiates a cell-  
213 autonomous program of cellular destruction involving protease and nuclease  
214 activation, PS exposure on the outer membrane, membrane blebbing, and the  
215 formation of apoptotic bodies<sup>2</sup>. Our current work adds to a growing body of  
216 evidence that the early events associated with apoptosis are not necessarily a death  
217 sentence. For example, activated T cells can transiently express active caspase-3  
218 and expose PS at the cell surface, but ultimately avoid cell death<sup>31-35</sup>. Moreover,  
219 phagocyte-dependent killing is critical for regulating the size of T cell, erythrocyte,  
220 and neutrophil populations, as well as removal of transient structures during



221 development<sup>36-44</sup>. Thus, mounting evidence suggests that phagocytosis is a critical  
222 final step in cell death *in vivo*.

223

224 The mechanism by which phagocytes actually kill their target cells remains  
225 unknown. Following phagocytosis, the engulfed cell would be exposed to lysosomal  
226 proteases and other degradative enzymes. Furthermore, under certain conditions  
227 phagocytes release reactive oxygen species (ROS) into the phagosome, and ROS  
228 have been shown to be important for the phagocytosis-induced death of neurons  
229 during development in the mouse brain<sup>36</sup>. It is tempting to speculate that the  
230 cytotoxic environment that a cell encounters within the phagosome following  
231 engulfment is ultimately responsible for its death. Although indirect mechanisms  
232 such as retinoic acid and cytokine production by phagocytes<sup>45</sup> and PS signaling<sup>31</sup>,  
233 might also impact thymocyte survival, the fact that we observe similar defects in  
234 negative selection upon phagocyte depletion, blocking PS, and mutation of a PS  
235 receptor, strongly suggests that phagocytes mediate thymocyte death directly via  
236 phagocytosis.

237

238 Our observation that negative selection is most efficient when phagocytes also serve  
239 as peptide-presenting cells implies that the phagocytic activity of a peptide-  
240 presenting cell is a key factor in determining thymocyte fate. Indeed, the inability to  
241 phagocytose could help to explain the relative inefficiency of thymic stromal cells to  
242 induce negative selection<sup>5-7,29</sup>, in contrast to the phagocytic activity of many  
243 hematopoietic cells which are potent inducers of negative selection. It is worth

244 noting that many thymic phagocytes, identified in this study by the expression of the  
245 LysM-GFP reporter, also express the DC marker CD11c<sup>13</sup> (Supplementary Fig. 1).  
246 Thus, a subset of thymic hematopoietic cells with characteristics of both DCs and  
247 macrophages may be particularly important mediators of negative selection.  
248 Although some non-phagocytic subsets, including mTECs, thymocytes, and B cells,  
249 can induce negative selection<sup>3,21,46</sup>, this process may be rendered less efficient by  
250 the requirement for a second cellular encounter with a phagocyte in order to  
251 complete negative selection (Supplementary Fig. 5b).  
252  
253 The initiation of phagocytosis is dependent on the recognition of target cells via a  
254 variety of receptors for “eat me” signals, including PS. We found that mutation of a  
255 single PS receptor, Tim-4, impaired negative selection to TRA, but had a less obvious  
256 impact on negative selection to ubiquitous antigen. On the other hand, globally  
257 blocking PS significantly impaired both forms of negative selection. These results  
258 could indicate that Tim-4 plays a non-redundant role in phagocytosis in the medulla,  
259 the site of TRA presentation, whereas other PS receptors may participate in  
260 phagocytosis in the thymic cortex, where negative selection to ubiquitous antigen  
261 takes place<sup>5,8,47</sup>. Alternatively, negative selection to TRA might be more sensitive to  
262 perturbations in phagocytosis, given that TRA are typically expressed at low levels,  
263 and may deliver a relatively weak apoptotic signal. In line with this idea, cells  
264 receiving a weak apoptotic signal in *C. elegans* embryos are more dependent upon  
265 phagocytosis for their death than cells receiving a strong apoptotic signal<sup>39</sup>. This  
266 raises the intriguing possibility that phagocytes might be especially critical during

267 negative selection to relatively low-affinity or rare self-antigens, which pose the  
268 greatest risk as targets of autoimmunity<sup>48</sup>.

269

270 A requirement for Tim-4 in negative selection involving relatively weak apoptotic  
271 stimuli is consistent with the mild autoimmune phenotype reported in Tim-4<sup>-/-</sup>  
272 mice<sup>49</sup>. Although their hyperimmune phenotype was initially attributed to defective  
273 phagocytosis in the periphery<sup>44,49</sup>, our data suggest that an increase in the release of  
274 autoreactive T cells from the thymus due to defective thymic phagocytes might also  
275 contribute. Notably, Tim-4<sup>-/-</sup> mice do not develop overt autoimmunity, likely due to  
276 the presence of other tolerance mechanisms, such as regulatory T cells and other  
277 peripheral tolerance mechanisms, which could serve to keep self-reactive T cells in  
278 check.

279

280 Our current data contribute to emerging evidence that the context in which an  
281 autoreactive thymocyte encounters peptides, shaped largely by the characteristics  
282 of the peptide-presenting cell, has profound impacts on its fate. We recently  
283 reported that thymic dendritic cells that provide both high-affinity TCR ligands and  
284 a local source of IL-2 can efficiently support the development of regulatory T  
285 cells<sup>30,47</sup>. Thus, the decision of an autoreactive thymocyte to die or differentiate may  
286 ultimately depend on whether it engages a peptide-presenting cell that promotes its  
287 death or supports its further development.

288

289

290 **Materials and methods**

291

292 **Mice**

293 All mice were bred and maintained under pathogen-free conditions in an American  
294 Association of Laboratory Animal Care-approved facility at the University of  
295 California, Berkeley. The University of California, Berkeley Animal Use and Care  
296 Committee approved all procedures. C57BL/6, C57BL/6-Tg(Ins2-  
297 TFRC/OVA)<sup>296</sup>Wehi/Wehi<sup>j</sup> (RIPmOVA), and C567BL/6-Tg(Csf1r-EGFP-  
298 NGFR/FKBP1A/TNFRSF6)<sup>2</sup>Bck/J (MAFIA) mice were from Jackson Labs. OT-I Rag2<sup>-/-</sup>  
299 <sup>-/-</sup> mice were from Taconic Farms. LysMGFP, F5 Rag1<sup>-/-</sup>, and Tim-4<sup>-/-</sup> mice have been  
300 previously described<sup>19,50,51</sup>. LysMGFP RIPmOVA and Tim-4<sup>-/-</sup> RIPmOVA mice were  
301 generated by crossing LysMGFP or Tim-4<sup>-/-</sup> mice to RIPmOVA mice. Mice were used  
302 from four to eight weeks of age.

303

304 **Thymocyte Isolation and Labeling**

305 Thymuses were collected from OT-I Rag2<sup>-/-</sup>, F5 Rag1<sup>-/-</sup>, or B6 mice and dissociated  
306 through a 70 $\mu$ m cell strainer to yield a cell suspension. Thymocytes were then  
307 labeled with 1 $\mu$ M Cell Proliferation Dye eFluor450 or 0.5 $\mu$ M Cell Proliferation Dye  
308 eFluor670 (Thermo Fisher Scientific) at 10<sup>7</sup> cells/ml at 37°C for 15 minutes in PBS,  
309 then washed and resuspended in complete RPMI (containing 10% FBS, penicillin  
310 streptomycin, and 2-mercaptoethanol, cRPMI) for overlay onto thymic slices.  
311 Thymocytes do not proliferate at the timepoints collected, allowing overlaid  
312 thymocytes to be distinguished from slice resident thymocytes by Cell Proliferation

313 Dyes (Fig. 1a). In imaging experiments, OT-I thymocytes were depleted of mature  
314 CD8 single positives using the EasySep Biotin Positive Selection Kit (Stemcell  
315 Technologies) with anti-human/mouse  $\beta 7$  integrin antibody (FIB504, Biolegend)  
316 according to the manufacturer's instructions. Thymocytes were then labeled with  
317  $3\mu\text{M}$  SNARF (Thermo Fisher Scientific) at  $10^7$  cells/ml at  $37^\circ\text{C}$  for 15 minutes in PBS,  
318 then washed and labeled with  $5\mu\text{M}$  Hoechst 33342 (Thermo Fisher Scientific) at  $10^7$   
319 cells/ml at  $37^\circ\text{C}$  for 15 minutes.

320

### 321 **Thymic Slices**

322 Preparation of thymic slices has been previously described<sup>52,53</sup>. Thymic lobes were  
323 cleaned of connective tissue, embedded in 4% agarose with a low melting point  
324 (GTG-NuSieve Agarose, Lonza), and sectioned into slices of 200-400 $\mu\text{m}$  using a  
325 vibratome (1000 Plus sectioning system, Leica). Slices were overlaid onto 0.4 $\mu\text{m}$   
326 transwell inserts set in 6 well tissue culture plates with 1ml cRPMI under the insert.  
327  $0.5\text{-}2 \times 10^6$  thymocytes in 10 $\mu\text{l}$  cRPMI were overlaid onto each slice and allowed to  
328 migrate into the slice for 2 hours, then excess thymocytes were removed by gentle  
329 washing with PBS. Thymocytes actively migrate into the slice and localize as  
330 expected based on their maturation status<sup>24,26,54</sup>. For peptide-induced negative  
331 selection, 10 $\mu\text{l}$  of  $1\mu\text{M}$  SIINFEKL (AnaSpec) in PBS was overlaid onto each slice for  
332 30 minutes, then removed by pipetting. To quantify negative selection, we used a  
333 fluorescent live/dead stain (Ghost Dye Violet 510 or Fixable Viability Dye  
334 eFluor780) to identify live cells (as shown in Fig. 1a). We then calculated the ratio  
335 of total live OT-I thymocytes to total live reference (either wild type thymocytes or

336 thymocytes expressing an irrelevant TCR: F5) recovered from the thymic slice. In  
337 general, the ratio of OT-I to reference populations was close to 1.0 in the absence of  
338 OVA, however, there was some variability due to differential ability of the two  
339 populations to enter or survive in the tissue. We therefore further normalized the  
340 ratios of OT-I:reference thymocytes in each experiment so that the average of the  
341 corresponding “no OVA” samples was always 1.0. For depletion of phagocytes, 1 $\mu$ M  
342 AP20187 (Clontech) was added to the media under the transwell and 10 $\mu$ l of 10 $\mu$ M  
343 AP20187 in PBS was added on top of each slice overnight (16-18 hours). The drug  
344 was washed out from the top of the slice with PBS prior to overlaying thymocytes.  
345 For Annexin V treatment, thymocytes were resuspended in Annexin V binding  
346 buffer (Thermo Fisher Scientific) with purified Annexin V (BioLegend) at 200 $\mu$ g/ml  
347 prior to overlaying on the slice. Following peptide treatment, 10 $\mu$ l of purified  
348 Annexin V at 200 $\mu$ g/ml in Annexin V binding buffer was overlaid onto each slice.

349

### 350 **Bone marrow-derived dendritic cell cultures**

351 Bone marrow was flushed from the femurs and tibias of mice into sterile PBS, and  
352 treated with ammonium chloride–potassium bicarbonate buffer for lysis of red  
353 blood cells. Cells were resuspended at 10<sup>6</sup>/ml in cRPMI with 20ng/ml granulocyte-  
354 macrophage colony-stimulating factor (GM-CSF, Peprotech) and plated for culture.  
355 Cells were cultured for 7 days, with replacement with fresh media containing GM-  
356 CSF on day 6. On day 7, semi-adherent cells were collected and loaded with 1 $\mu$ M  
357 SIINFEKL at 10<sup>7</sup>/ml in cRPMI at 37°C for 30 minutes. Some BMDCs were incubated

358 without peptide, as indicated. Cells were then washed and  $10^5$  BMDCs were overlaid  
359 per slice, following washout of excess thymocytes.

360

### 361 **Flow cytometry**

362 Thymic slices, whole thymuses, and spleens were dissociated into FACS buffer  
363 (0.5% BSA in PBS) and filtered before staining. Splenocytes and blood samples were  
364 treated with ammonium chloride-potassium bicarbonate buffer for 5 or 10 minutes,  
365 respectively, at room temperature prior to staining to lyse red blood cells. Cells  
366 were stained for 10 minutes on ice in 24G2 supernatant containing the following  
367 antibodies: CD4 (GK1.5), CD8 $\alpha$  (53-6.7), CD69 (H1.2F3). Cells were then washed in  
368 PBS and stained in Ghost Dye Violet 510 (Tonbo Biosciences) or Fixable Viability  
369 Dye eFluor780 (Thermo Fisher Scientific) for 10 minutes on ice. For staining of  
370 thymic phagocyte populations, whole thymuses were minced and incubated in  
371 cRPMI containing 1mg/ml collagenase Type IA (Sigma) and 400 $\mu$ g/ml DNase I  
372 (Roche) at 37°C for 1 hour. After vigorous pipetting, samples were filtered, then  
373 stained in 24G2 supernatant containing the following antibodies: CD11b (M1/70),  
374 CD11c (N418), F4/80 (BM8), Tim-4 (RMT4-54), MHC I H-2Kd/H2-Dd (34-1-2S),  
375 MHC II I-A/I-E (M5/114.15.2), CD80 (16-10A1), CD86 (GL1), ICAM (YN1/1.7.4).  
376 Cells were then washed in PBS and stained in Fixable Viability Dye eFluor780  
377 (Thermo Fisher Scientific) for 10 minutes on ice. All antibodies were from Thermo  
378 Fisher Scientific, Biolegend, or Tonbo Biosciences. Flow cytometry was performed  
379 with a LSRII or Fortessa X20 (BD Biosciences) and FlowJo software (TreeStar) was

380 used for data analysis. Gating strategies are shown for thymocytes (Fig. 1a) and  
381 thymic phagocyte populations (Supplementary Fig. 1).

382

### 383 **Two-photon microscopy**

384 Two-photon imaging of thymic slices has been described previously<sup>10,29,52</sup>. Briefly,  
385 thymic slices were glued to coverslips and fixed to a dish being perfused at a rate of  
386 1ml/minute with oxygenated, phenol red-free DMEM media warmed to 37°C.  
387 Imaging was performed with a Zeiss 7 MP two-photon microscope with a Coherent  
388 Chameleon laser tuned to 920nm. Signals were separated using 495nm and 560nm  
389 dichroic mirrors. Imaging volumes were scanned every 30 seconds for 30 minutes,  
390 and images were processed with Imaris 7.3 software (Bitplane).

391

### 392 **Statistics**

393 Statistical analysis was carried out using Prism software (GraphPad). The  
394 D'Agostino and Pearson omnibus K2 normality test, Shapiro-Wilk normality test, or  
395 Kolmogorov-Smirnov test was applied depending on sample size, and parametric or  
396 non-parametric statistical analyses were carried out as appropriate (specific tests  
397 used are indicated in figure legends). P values of <0.05 were considered significant.

398

### 399 **Acknowledgements**

400 We would like to thank members of the Robey lab for technical advice and helpful  
401 discussion, H. Melichar, B. Weist, and B.J. Fowlkes for critical reading of the  
402 manuscript, S. W. Chan and O. Guevarra for technical assistance, P. Herzmark for



403 help with two-photon imaging, and Wenjun Ouyang (Genentech) for providing  
404 Tim4<sup>-/-</sup> mice. Supported by the National Institutes of Health (R01AI064227 to  
405 E.A.R.) and a University of California Cancer Research Coordinating Committee  
406 Fellowship to N.S.K..

### **Competing Interests**

The authors declare no competing interests.

### **References**

4

1. Starr, T. K., Jameson, S. C. & Hogquist, K. A. Positive and Negative Selection of T Cells. *Annu. Rev. Immunol.* **21**, 139–176 (2003).
2. Strasser, A., O'Connor, L. & Dixit, V. M. Apoptosis Signaling. *Annu. Rev. Biochem.* **69**, 217–245 (2000).
3. Gallegos, A. & Bevan, M. Central Tolerance to Tissue-specific Antigens Mediated by Direct and Indirect Antigen Presentation. *Journal of Experimental Medicine* (2004).
4. Taniguchi, R. *et al.* Detection of an autoreactive T cell population within the polyclonal repertoire that undergoes distinct Aire-mediated selection. *Proceedings of the National Academy of Sciences* 1–6 (2012). doi:10.1073/pnas.1120607109/-/DCSupplemental/pnas.201120607SI.pdf
5. McCaughy, T. M., Baldwin, T. A., Wilken, M. S. & Hogquist, K. A. Clonal deletion of thymocytes can occur in the cortex with no involvement of the medulla. *Journal of Experimental Medicine* **205**, 2575–2584 (2008).
6. Proietto, A. & Wu, L. Dendritic cells in the thymus contribute to regulatory T cell induction. *Proceedings of the National Academy of Sciences* 1–8 (2008).
7. Ohnmacht, C. *et al.* Constitutive ablation of dendritic cells breaks self-tolerance of CD4 T cells and results in spontaneous fatal autoimmunity. *Journal of Experimental Medicine* **206**, 549–559 (2009).
8. Klein, L., Kyewski, B., Allen, P. M. & Hogquist, K. A. Positive and negative selection of the T cell repertoire: what thymocytes see (and don't see). *Nat Rev Immunol* **14**, 377–391 (2014).
9. Surh, C. D. & Sprent, J. T-cell apoptosis detected *in situ* during positive and negative selection in the thymus. *Nature* **312**, 100–103 (1994).
10. Dzhagalov, I. L., Chen, K. G., Herzmark, P. & Robey, E. A. Elimination of Self-Reactive T Cells in the Thymus: A Timeline for Negative Selection. *PLoS Biol* **11**, e1001566 (2013).
11. Norbury, C. C., Malide, D., Gibbs, J. S., Bennink, J. R. & Yewdell, J. W. Visualizing priming of virus-specific CD8<sup>+</sup> T cells by infected dendritic cells *in vivo*. *Nat Immunol* **3**, 265–271 (2002).
12. Guerri, L. *et al.* Analysis of APC Types Involved in CD4 Tolerance and Regulatory T Cell Generation Using Reaggregated Thymic Organ Cultures. *The*

- Journal of Immunology* **190**, 2102–2110 (2013).
13. Ladi, E. *et al.* Thymocyte-Dendritic Cell Interactions near Sources of CCR7 Ligands in the Thymic Cortex. *The Journal of Immunology* **181**, 7014–7023 (2008).
  14. Arandjelovic, S. & Ravichandran, K. S. Phagocytosis of apoptotic cells in homeostasis. *Nat Immunol* **16**, 907–917 (2015).
  15. Miyanishi, M. *et al.* Identification of Tim4 as a phosphatidylserine receptor. *Nature* **450**, 435–439 (2007).
  16. Tacke, R. *et al.* The transcription factor NR4A1 is essential for the development of a novel macrophage subset in the thymus. *Nature Publishing Group* 1–13 (2015). doi:10.1038/srep10055
  17. Elliott, M. R. *et al.* Nucleotides released by apoptotic cells act as a find-me signal to promote phagocytic clearance. *Nature* **461**, 282–286 (2009).
  18. Burnett, S. H. Conditional macrophage ablation in transgenic mice expressing a Fas-based suicide gene. *Journal of Leukocyte Biology* **75**, 612–623 (2004).
  19. Faust, N., Varas, F., Kelly, L. M., Heck, S. & Graf, T. Insertion of enhanced green fluorescent protein into the lysozyme gene creates mice with green fluorescent granulocytes and macrophages. *Blood* **96**, 719–726 (2000).
  20. Au-Yeung, B. B. *et al.* Quantitative and temporal requirements revealed for Zap70 catalytic activity during T cell development. *Nat Immunol* **15**, 687–694 (2014).
  21. Melichar, H. J., Ross, J. O., Taylor, K. T. & Robey, E. A. Stable Interactions and Sustained TCR Signaling Characterize Thymocyte–Thymocyte Interactions that Support Negative Selection. *The Journal of Immunology* **194**, 1057–1061 (2015).
  22. Kurts, C. *et al.* Constitutive Class I-restricted Exogenous Presentation of Self Antigens In Vivo. *Journal of Experimental Medicine* **184**, 923–930 (1996).
  23. Ross, J. O. *et al.* Distinct phases in the positive selection of CD8+ T cells distinguished by intrathymic migration and T-cell receptor signaling patterns. *Proceedings of the National Academy of Sciences* **111**, E2550–E2558 (2014).
  24. Halkias, J. *et al.* Opposing chemokine gradients control human thymocyte migration in situ. *J. Clin. Invest.* **123**, 2131–2142 (2013).
  25. Yin, X. *et al.* CCR7 Expression in Developing Thymocytes Is Linked to the CD4 versus CD8 Lineage Decision. *The Journal of Immunology* **179**, 7358–7364 (2007).
  26. Kurd, N. & Robey, E. A. T-cell selection in the thymus: a spatial and temporal perspective. *Immunol Rev* **271**, 114–126 (2016).
  27. Mempel, T. R. *et al.* Regulatory T Cells Reversibly Suppress Cytotoxic T Cell Function Independent of Effector Differentiation. *Immunity* **25**, 129–141 (2006).
  28. Krahling, S., Callahan, M. K., Williamson, P. & Schlegel, R. A. Exposure of phosphatidylserine is a general feature in the phagocytosis of apoptotic lymphocytes by macrophages. *Cell Death and Differentiation* **6**, 183–189 (1999).
  29. Melichar, H. J., Ross, J. O., Herzmark, P., Hogquist, K. A. & Robey, E. A. Distinct Temporal Patterns of T Cell Receptor Signaling During Positive Versus

- Negative Selection in Situ. *Science Signaling* **6**, ra92 1–14 (2013).
30. Weist, B. M., Kurd, N., Boussier, J., Chan, S. W. & Robey, E. A. Thymic regulatory T cell niche size is dictated by limiting IL-2 from antigen-bearing dendritic cells and feedback competition. *Nat Immunol* **16**, 635–641 (2015).
  31. Elliott, J. I. *et al.* Membrane phosphatidylserine distribution as a non-apoptotic signalling mechanism in lymphocytes. *Nat Cell Biol* **7**, 808–816 (2005).
  32. Fischer, K. *et al.* Antigen recognition induces phosphatidylserine exposure on the cell surface of human CD8+ T cells. *Blood* **108**, 4094–4101 (2006).
  33. Miossec, C., Dutilleul, V., Fassy, F. & Diu-Hercend, A. Evidence for CPP32 Activation in the Absence of Apoptosis during T Lymphocyte Stimulation. *Journal of Biological Chemistry* **272**, 13459–13462 (1997).
  34. Alam, A., Cohen, L. Y., Aouad, S. & Sekaly, R.-P. Early Activation of Caspases during T Lymphocyte Stimulation Results in Selective Substrate Cleavage in Nonapoptotic Cells. *Journal of Experimental Medicine* **190**, 1879–1890 (1999).
  35. McComb, S., Mulligan, R. & Sad, S. Caspase-3 Is Transiently Activated without Cell Death during Early Antigen Driven Expansion of CD8+ T Cells In Vivo. *PLoS ONE* **5**, e15328 (2010).
  36. Marin-Teva, J. L. *et al.* Microglia Promote the Death of Developing Purkinje Cells. *Neuron* **41**, 535–547 (2004).
  37. Lang, R. A. & Bishop, J. M. Macrophages Are Required for Cell Death and Tissue Remodeling in the Developing Mouse Eye. *Cell* **74**, 453–462 (1993).
  38. Reddien, P. W., Cameron, S. & Horvitz, H. R. Phagocytosis promotes programmed cell death in *C. elegans*. *Nature* **412**, 198–202 (2001).
  39. Hoepfner, D. J., Hengartner, M. O. & Schnabel, R. Engulfment genes cooperate with *ced-3* to promote cell death in *Caenorhabditis elegans*. *Nature* **412**, 202–206 (2001).
  40. Park, Y.-J. *et al.* PAI-1 inhibits neutrophil efferocytosis. *Proceedings of the National Academy of Sciences* **105**, 11784–11789 (2008).
  41. Dalli, J. *et al.* Annexin A1 regulates neutrophil clearance by macrophages in the mouse bone marrow. *The FASEB Journal* **26**, 387–396 (2012).
  42. Khandelwal, S., van Rooijen, N. & Saxena, R. K. Reduced expression of CD47 during murine red blood cell (RBC) senescence and its role in RBC clearance from the circulation. *Transfusion* **47**, 1725–1732 (2007).
  43. Oldenberg, P.-A. *et al.* Role of CD47 as a Marker of Self on Red Blood Cells. *Science* **288**, 2051–2054 (2000).
  44. Albacker, L. A. *et al.* TIM-4, a Receptor for Phosphatidylserine, Controls Adaptive Immunity by Regulating the Removal of Antigen-Specific T Cells. *The Journal of Immunology* **185**, 6839–6849 (2010).
  45. Sarang, Z. *et al.* Immunobiology. *Immunobiology* **218**, 1354–1360 (2013).
  46. Yamano, T. *et al.* Thymic B Cells Are Licensed to Present Self Antigens for Central T Cell Tolerance Induction. *Immunity* **42**, 1048–1061 (2015).
  47. Klein, L., Robey, E. A. & Hsieh, C.-S. Central CD4. *Nat Rev Immunol* 1–12 (2018). doi:10.1038/s41577-018-0083-6
  48. Koehli, S., Naeher, D., Galati-Fournier, V., Zehn, D. & Palmer, E. Optimal T-cell receptor affinity for inducing autoimmunity. *Proceedings of the National Academy of Sciences* **111**, 17248–17253 (2014).

49. Rodriguez-Manzanet, R. *et al.* T and B cell hyperactivity and autoimmunity associated with niche-specific defects in apoptotic body clearance in TIM-4-deficient mice. *Proceedings of the National Academy of Sciences* **107**, 8706–8711 (2010).
50. Mamalaki, C. *et al.* Thymic depletion and peripheral activation of class. *Proceedings of the National Academy of Sciences* **89**, 11342–11346 (1992).
51. Wong, K. *et al.* Phosphatidylserine receptor Tim-4 is essential for the maintenance of the homeostatic state of resident peritoneal macrophages. *Proceedings of the National Academy of Sciences* **107**, 8712–8717 (2010).
52. Dzhagalov, I. L., Melichar, H. J., Ross, J. O., Herzmark, P. & Robey, E. A. *Two-Photon Imaging of the Immune System*. **60**, 12.26.1–12.26.20 (Current Protocols in Cytometry, 2012).
53. Ross, J. O., Melichar, H. J., Halkias, J. & Robey, E. A. in *Methods in Molecular Biology* **1323**, 131–140 (Springer New York, 2016).
54. Ehrlich, L. I. R., Oh, D. Y., Weissman, I. L. & Lewis, R. S. Differential Contribution of Chemotaxis and Substrate Restriction to Segregation of Immature and Mature Thymocytes. *Immunity* **31**, 986–998 (2009).
